# Supplementary material for: Mining Genes Involved in Insecticide Resistance of Liposcelis bostrychophila Badonnel by Transcriptome and Expression Profile Analysis
Source: PLoS One. 2013 Nov 20;8(11):e79878. doi: 10.1371/journal.pone.0079878 (PMC3835895; doi:10.1371/journal.pone.0079878)
Supplement: Table S3 — The primers employed in the qRT-PCR. (XLS) [file pone.0079878.s003.xls]

## Sheet: Sheet1
		Primer sequences (5' to 3')
Gene name	Gene ID	Sense	antisense
Vicilin	1917	TCGCCAAGATTCTCCACACC	ATCCGAGGTCTTTAACGCCG
Trypsin	2125	TCCAGCGTTAGAGGCCATTC	TTGCTCAGCCGGTAACAAGT
Endochitinase	518	GCTTGGGGCTACTGCTTCAA	GCAGGCCCGTAGTTGTAGTT
Keratin 1	2862	AGTCTTCAGCGACTTGTGGG	TCGTAAGAGGAGCGCCATTC
Keratin 2	3487	CCAACCGCATTATGGACAA	AAACCTGATCCGAGTCCTGA
Serine	6089	CAAGATCGACACCAACGGGA	TCGATCGACGGAGAACGTAA
CYP450-1	32368	TGCATAGGACAAAAATTCGCCA	TCATCCCATTGGTTGACGAC
CYP450-2	37036	GGAAGCTCACAATGGGAAAG	CAGGGCTTTCTTTTGCTGTC
Checkpoint protein	2235	GCTGATAGGCCAGCAACTTC	GAGACGGACACCAGGTTGAT
RlpA family protein	23860	CCACCTCACTGGGCTTATGG	AAGGTTTTATGGGCTGCGGT
